# Supplementary material for: Phosphatidylethanolamine-phosphatidylserine binding synergy of seven coagulation factors revealed using Nanodisc arrays on silicon photonic sensors
Source: PubMed Central journal article supplement (PMC7562748; doi:10.1038/s41598-020-73647-3), 2020-10-15
Supplement: 41598_2020_73647_MOESM1_ESM.pdf [file 41598_2020_73647_MOESM1_ESM.pdf]

# Phosphatidylethanolamine-Phosphatidylserine Binding Synergy of Seven Coagulation Factors Revealed Using Nanodisc Arrays on Silicon Photonic Sensors

Sara M. Medfisch,<sup>1,3</sup> Ellen M. Muehl,<sup>1,3</sup> James H. Morrissey,<sup>2</sup> and Ryan C. Bailey<sup>1,\*</sup>

<sup>1</sup>Department of Chemistry, University of Michigan, 930 N. University Avenue, Ann Arbor, Michigan 48109, United States; <sup>2</sup>Department of Biological Chemistry, University of Michigan, 1150 W. Medical Center Drive, Ann Arbor, Michigan 48109, United States; <sup>3</sup>These authors contributed equally: Sara M. Medfisch and Ellen M. Muehl

|                                                                      |    |
|----------------------------------------------------------------------|----|
| Figure S1: Prothrombin (PT) $K_d$ determination .....                | S2 |
| Figure S2: Factor X (fX) $K_d$ determination.....                    | S3 |
| Figure S2: Factor IX (fIX) $K_d$ determination .....                 | S4 |
| Figure S4: Activated protein C (aPC) $K_d$ determination .....       | S5 |
| Figure S5: Protein S (PrS) $K_d$ determination.....                  | S6 |
| Figure S6: Protein Z (PrZ) $K_d$ determination .....                 | S7 |
| Table S1: $K_d$ values of PT, fX, fIX, fVIIa, aPC, PrS, and PrZ..... | S8 |

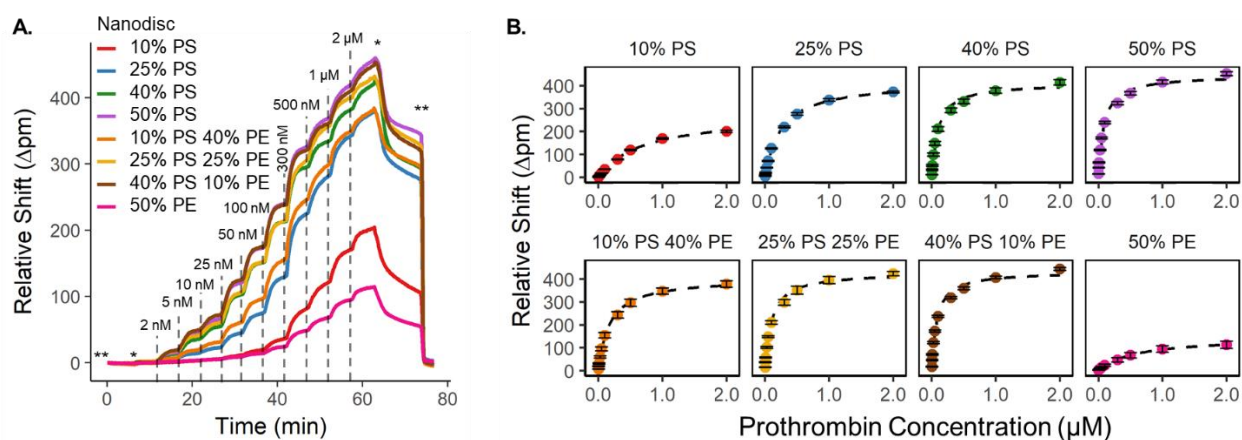

### Figure S1: Prothrombin (PT) binding titration and $K_d$ determination

For  $K_d$  determination, PT was flowed across a sensor chip, (Figure S1). The concentrations of PT used were 2 nM, 5 nM, 10 nM, 25 nM, 50 nM, 100 nM, 300 nM, 500 nM, 1000 nM, and 2000 nM. **A.** The PT binding response during a titration, flowed at 10  $\mu\text{L}/\text{min}$ . Subtraction of binding to 100% PC Nanodiscs was used to correct for nonspecific binding. Each trace depicts the average binding response to a different Nanodisc: 10% PS (red), 10% PS 40% PE (orange), 25% PS (blue), 25% PS 25% PE (yellow), 40% PS (green), 40% PS 10% PS (brown), 50% PE (pink), and 50% PS (purple) all made with PC as the balance. The dashed lines indicate the addition of a new concentration of PT, the \*marks the transition to HEPES buffer, and \*\* marks the transition to HEPES (-). **B.** The maximal shift of PT binding vs PT concentration fit to Equation (1) for each type of Nanodisc used.

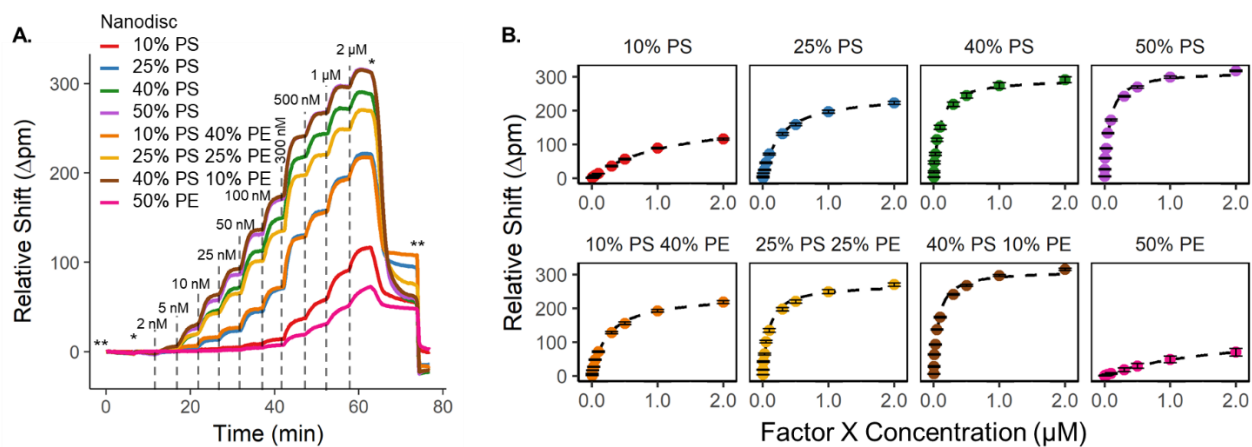

### Figure S2: Factor X (fX) binding titration and $K_d$ determination

For  $K_d$  determination, fX was flowed across a sensor chip, (Figure S1). The concentrations of fX used were 2 nM, 5 nM, 10 nM, 25 nM, 50 nM, 100 nM, 300 nM, 500 nM, 1000 nM, and 2000 nM. **A.** The fX binding response during a titration, flowed at 10  $\mu$ L/min. Subtraction of binding to 100% PC Nanodiscs was used to correct for nonspecific binding. Each trace depicts the average binding response to a different Nanodisc: 10% PS (red), 10% PS 40% PE (orange), 25% PS (blue), 25% PS 25% PE (yellow), 40% PS (green), 40% PS 10% PS (brown), 50% PE (pink), and 50% PS (purple) all made with PC as the balance. The dashed lines indicate the addition of a new concentration of fX, the \*marks the transition to HEPES buffer, and \*\* marks the transition to HEPES (-). **B.** The maximal shift of fX binding vs fX concentration fit to Equation (1) for each type of Nanodisc used.

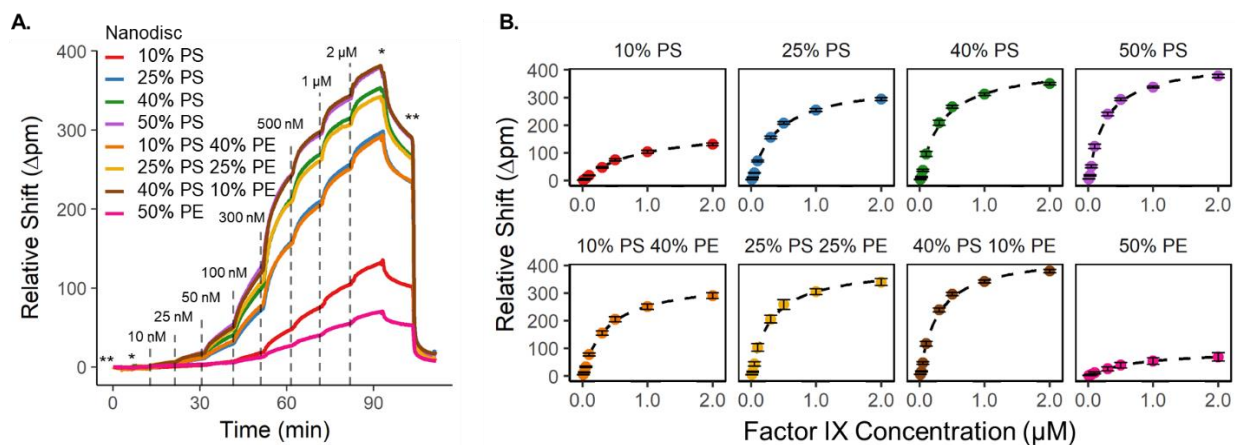

### Figure S3: Factor IX (fIX) binding titration and $K_d$ determination

For  $K_d$  determination, fIX was flowed across a sensor chip, (Figure S1). The concentrations of fIX used were 10 nM, 25 nM, 50 nM, 100 nM, 300 nM, 500 nM, 1000 nM, and 2000 nM. **A.** The fIX binding response during a titration, flowed at 10  $\mu$ L/min. Subtraction of binding to 100% PC Nanodiscs was used to correct for nonspecific binding. Each trace depicts the average binding response to a different Nanodisc: 10% PS (red), 10% PS 40% PE (orange), 25% PS (blue), 25% PS 25% PE (yellow), 40% PS (green), 40% PS 10% PS (brown), 50% PE (pink), and 50% PS (purple) all made with PC as the balance. The dashed lines indicate the addition of a new concentration of fIX, the \*marks the transition to HEPES buffer, and \*\* marks the transition to HEPES (-). **B.** The maximal shift of fIX binding vs fIX concentration fit to Equation (1) for each type of Nanodisc used.

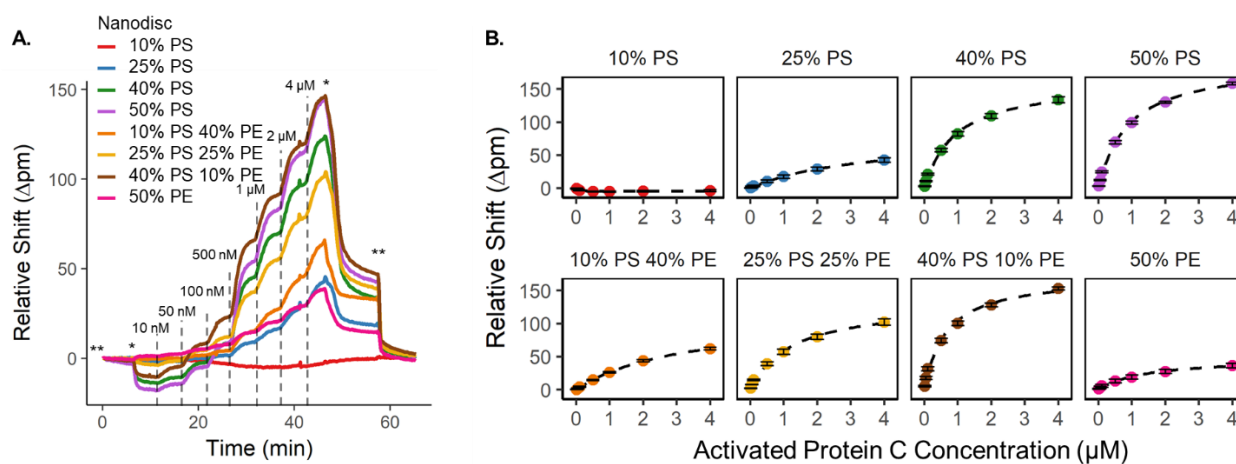

**Figure S4: Activated protein C (aPC) binding titration and  $K_d$  determination**

For  $K_d$  determination, aPC was flowed across a sensor chip, (Figure S1). The concentrations of aPC used were 10nM, 50 nM, 100 nM, 500 nM, 1000 nM, 2000 nM, and 4000 nM. **A.** The aPC binding response during a titration, flowed at 10  $\mu$ L/min. Subtraction of binding to 100% PC Nanodiscs was used to correct for nonspecific binding. Each trace depicts the average binding response to a different Nanodisc: 10% PS (red), 10% PS 40% PE (orange), 25% PS (blue), 25% PS 25% PE (yellow), 40% PS (green), 40% PS 10% PS (brown), 50% PE (pink), and 50% PS (purple) all made with PC as the balance. The dashed lines indicate the addition of a new concentration of aPC, the \*marks the transition to HEPES buffer, and \*\* marks the transition to HEPES (-). **B.** The maximal shift of aPC binding vs aPC concentration fit to Equation (1) for each type of Nanodisc used.

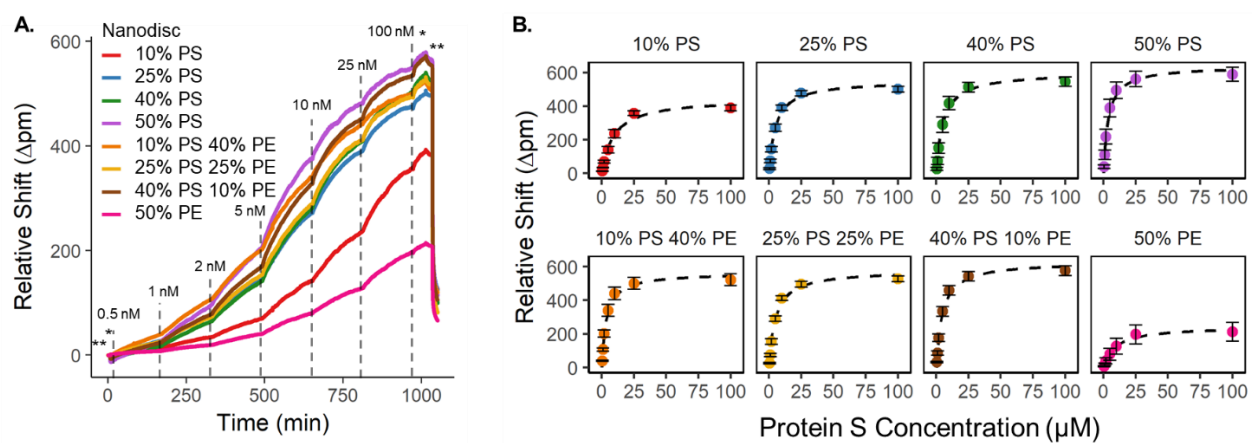

**Figure S5: Protein S (PrS) binding titration and  $K_d$  determination**

For  $K_d$  determination, PrS was flowed across a sensor chip, (Figure S1). The concentrations of PrS used were 10 nM, 25 nM, 50 nM, 100 nM, 300 nM, 500 nM, 1000 nM, 2000 nM, and 4000 nM. **A.** The PrS binding response during a titration, flowed at 10  $\mu$ L/min. Subtraction of binding to 100% PC Nanodiscs was used to correct for nonspecific binding. Each trace depicts the average binding response to a different Nanodisc: 10% PS (red), 10% PS 40% PE (orange), 25% PS (blue), 25% PS 25% PE (yellow), 40% PS (green), 40% PS 10% PS (brown), 50% PE (pink), and 50% PS (purple) all made with PC as the balance. The dashed lines indicate the addition of a new concentration of PrS, the \*marks the transition to HEPES buffer, and \*\* marks the transition to HEPES (-). **B.** The maximal shift of PrS binding vs PrS concentration fit to Equation (1) for each type of Nanodisc used.

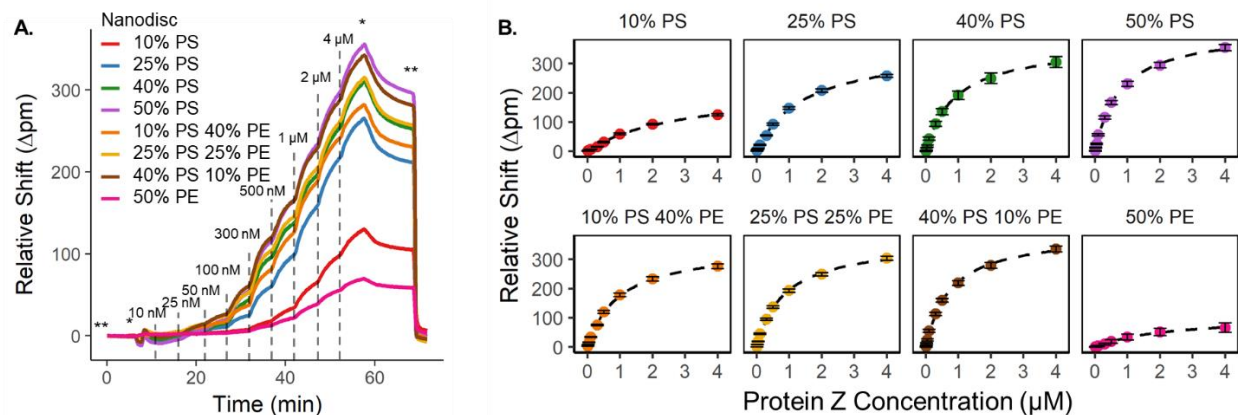

### Figure S6: Protein Z (PrZ) binding titration and $K_d$ determination

For  $K_d$  determination, PrZ was flowed across a sensor chip, (Figure S1). The concentrations of PrZ used were 10 nM, 25 nM, 50 nM, 100 nM, 300 nM, 500 nM, 1000 nM, 2000 nM, and 4000 nM. **A.** The PrZ binding response during a titration, flowed at 10  $\mu$ L/min. Subtraction of binding to 100% PC Nanodiscs was used to correct for nonspecific binding. Each trace depicts the average binding response to a different Nanodisc: 10% PS (red), 10% PS 40% PE (orange), 25% PS (blue), 25% PS 25% PE (yellow), 40% PS (green), 40% PS 10% PE (brown), 50% PE (pink), and 50% PS (purple) all made with PC as the balance. The dashed lines indicate the addition of a new concentration of PrZ, the \*marks the transition to HEPES buffer, and \*\* marks the transition to HEPES (-). **B.** The maximal shift of PrZ binding vs PrZ concentration fit to Equation (1) for each type of Nanodisc used.

**Table S1:  $K_d$  values in nM of PT, fX, fIX, fVIIa, aPC, PrZ, and PrS**

|              | <i>10% PS</i> | <i>25% PS</i> | <i>40% PS</i> | <i>50% PS</i> | <i>10% PS<br/>40% PE</i> | <i>25% PS<br/>25% PE</i> | <i>40% PS<br/>10% PE</i> | <i>50% PE</i> |
|--------------|---------------|---------------|---------------|---------------|--------------------------|--------------------------|--------------------------|---------------|
| <i>PT</i>    | 670 ± 30      | 244 ± 8       | 93 ± 6        | 82 ± 1        | 190 ± 30                 | 98 ± 2                   | 76 ± 4                   | 600 ± 200     |
| <i>fX</i>    | 1130 ± 60     | 260 ± 10      | 87 ± 7        | 73 ± 2        | 250 ± 20                 | 92 ± 5                   | 67 ± 3                   | 2000 ± 700    |
| <i>fIX</i>   | 810 ± 30      | 390 ± 10      | 310 ± 30      | 260 ± 20      | 390 ± 30                 | 290 ± 20                 | 280 ± 20                 | 800 ± 100     |
| <i>fVIIa</i> | 1800 ± 300    | 1260 ± 50     | 900 ± 90      | 790 ± 50      | 690 ± 50                 | 740 ± 50                 | 690 ± 50                 | 860 ± 60      |
| <i>aPC</i>   | NA            | 3600 ± 1000   | 920 ± 80      | 880 ± 80      | 3200 ± 300               | 1210 ± 80                | 650 ± 80                 | 1500 ± 600    |
| <i>PrS</i>   | 9.7 ± 0.8     | 5.0 ± 0.5     | 5.3 ± 1.0     | 4.0 ± 0.3     | 3.8 ± 0.4                | 5.0 ± 0.4                | 4.7 ± 0.5                | 11 ± 2        |
| <i>PrZ</i>   | 2800 ± 200    | 1430 ± 90     | 900 ± 60      | 780 ± 30      | 1010 ± 60                | 860 ± 30                 | 750 ± 40                 | 2500 ± 700    |

Error represents standard deviation from at least n=4 microrings in a single detection experiment.

NA values were unable to be calculated.
